# Supplementary material for: Oregano essential oil inhibits Candida spp. biofilms
Source: publisher site journal article supplement (doi:10.1515/znc-2021-0002), 2021-04-29
Supplement: Supplementary file 1 [file j_znc-2021-0002_suppl.docx]

**Supp. 1:** Results of crystal violet staining. Each experiment was performed six times and biofilm production quantities are reported as the arithmetic mean of absorbance values (OD595 nm).
